# Supplementary material for: Statistical finite elements for misspecified models
Source: PubMed Central journal article supplement (PMC7812808; doi:10.1073/pnas.2015006118), 2020-12-28
Supplement: pnas.2015006118.sapp.pdf [file pnas.2015006118.sapp.pdf]

1

2 **Supplementary Information for**  
3 **Statistical finite elements for misspecified models**

4 **Connor Duffin, Edward Cripps, Thomas Stemler and Mark Girolami**

5 **Corresponding author: Connor Duffin**

6 **E-mail: [connor.duffin@research.uwa.edu.au](mailto:connor.duffin@research.uwa.edu.au)**

7 **This PDF file includes:**

8 Figs. S1 to S4

9 References for SI reference citations

## 10 1. Linear, static statFEM

11 An elliptic PDE with coefficients  $\Lambda$  can be written as:

$$12 \begin{cases} L_\Lambda u = f + \xi_\theta, & \text{in } \Omega, \quad \xi_\theta \sim \mathcal{GP}(0, k_\theta(\cdot, \cdot)), \\ u = 0 & \text{on } \partial\Omega, \\ u := u(x), \quad f := f(x), & x \in \Omega \subset \mathbb{R}^d. \end{cases} \quad [1]$$

13 We will now derive a Gaussian measure  $\mu_0$  which serves as the prior reference measure. Typical analysis of the deterministic  
14 problem begins by looking for weak solutions to Eq. (1) by multiplying by testing functions  $\psi \in H_0^1(\Omega)$  assuming that  $f \in L^2(\Omega)$ .  
15 The space  $H_0^1(\Omega)$  denotes the Sobolev space with first-order weak derivatives in  $L^2(\Omega)$  that vanish on  $\partial\Omega$ .

16 To start we show that if we assume  $\xi_\theta \in L^2(\Omega)$  then we can define a Gaussian measure on  $L^2(\Omega)$ . Writing the  $L^2$  inner  
17 product as  $\langle f, g \rangle = \int_\Omega f(x)g(x) dx$ , which is understood as a Lebesgue integral, we can define a Gaussian measure  $\mathcal{N}(0, C_\theta)$   
18 from the random field as the covariance operator  $C_\theta$  is defined from the kernel  $k_\theta$  (see (1), Chapter 6), i.e.

$$19 (C_\theta h)(x) = \int k_\theta(x, x')h(x') dx',$$

20 so  $\xi_\theta \sim \mathcal{N}(0, C_\theta)$  on  $L^2(\Omega)$ .

21 We now return to Eq. (1) and multiply by test functions  $\psi \in H_0^1(\Omega)$  — also assuming solutions  $u \in H_0^1(\Omega)$  — and integrating  
22 over the problem domain  $\Omega$  to give the weak form:

$$23 \mathcal{A}_\Lambda(u, \psi) = \langle f, \psi \rangle + \langle \xi_\theta, \psi \rangle$$

24 where  $\mathcal{A}_\Lambda(\cdot, \cdot)$  is the bilinear form generated from  $L_\Lambda$ . We note that it is assumed  $f, \xi_\theta \in L^2(\Omega)$ . The Sobolev space  $H_0^1(\Omega)$  has  
25 an orthonormal basis  $\{\phi_i\}_{i \in \mathbb{N}}$  so  $u = \sum_{i=1}^\infty u_i \phi_i(x)$  and thus

$$26 \sum_{i=1}^\infty u_i \mathcal{A}_\Lambda(\phi_i, \psi) = \langle f, \psi \rangle + \langle \xi_\theta, \psi \rangle.$$

27 Now as  $\psi \in H_0^1(\Omega)$  also we can write without loss of generality

$$28 \sum_{i=1}^\infty u_i \mathcal{A}_\Lambda(\phi_i, \phi_j) = \langle f, \phi_j \rangle + \langle \xi_\theta, \phi_j \rangle, \quad j \in \mathbb{N}.$$

29 The above can be viewed as an infinite system of equations with the matrix  $A$  having entries  $A_{ij} = \mathcal{A}_\Lambda(\phi_i, \phi_j)$ , and thus can  
30 be viewed as an operator on  $\ell^2$  as  $Au = \left\{ \sum_{i=1}^\infty u_i \mathcal{A}_\Lambda(\phi_i, \phi_j) \right\}_{j \in \mathbb{N}}$ . We assume the  $\ell^2$  structure for the following theorem.

31 **Theorem 1.** *The operator  $A : \ell^2 \rightarrow \ell^2$  is invertible.*

*Proof.* If  $A$  is not invertible then  $Au = 0$  for some  $u \neq 0$ . We show that if  $Au = 0$  and  $u \neq 0$  that this leads to a contradiction.

$$\begin{aligned} \langle Au, u \rangle &= \sum_i u_i \sum_j \mathcal{A}_\Lambda(\phi_i, \phi_j) u_j \\ &= \sum_i \sum_j \mathcal{A}_\Lambda(u_i \phi_i, u_j \phi_j) \\ &= \mathcal{A}_\Lambda \left( \sum_i u_i \phi_i, \sum_j u_j \phi_j \right) \\ &= \mathcal{A}_\Lambda(u, u) \geq |C| \|u\|^2 > 0, \end{aligned}$$

32 where the last inequality is because  $u \neq 0$  and is established from the coercivity of the bilinear form (2). This contradicts  
33  $Au = 0$ .  $\square$

Then for  $b = \{\langle f, \phi_j \rangle\}_j$ ,  $\xi = \{\langle \xi_\theta, \phi_j \rangle\}_j$ , we have  $u = A^{-1}(b + \xi)$ . Thus  $\mathbb{E}u = A^{-1}b$ , and

$$\mathbb{E}[(u - \mathbb{E}u) \otimes (u - \mathbb{E}u)] = A^{-1}GA^{-1}, \quad G_{ij} = \int \phi_i(x) \int k_\theta(x, x') \phi_j(x') dx' dx.$$

34 So  $\{u_i\}_i \sim \mu_0 = \mathcal{N}(A^{-1}b, A^{-1}GA^{-1})$  and so we write  $u \sim \mu_0 = \mathcal{N}(m_u, C_u)$  (the dominating measure for the posterior).

35 Using the Radon-Nikodym derivative we can then define the posterior measure  $\mu^y$  on function space (1) under the condition  
36 that the posterior is absolutely continuous with respect to the prior. This gives the (infinite-dimensional) posterior ( $Z$   
37 normalizing constant):

$$38 \frac{d\mu^y}{d\mu_0} = \frac{1}{Z} \exp \left( -\frac{1}{2} \|y - Hu\|_{\sigma^2 \mathbf{I}}^2 \right).$$

39 With  $H : H_0^1(\Omega) \rightarrow \mathbb{R}^N$ . In this work we assume that  $H$  is a linear operator that maps from the function space to the  
 40 data space and typically refer to it as the observation operator. The data-generating-process is assumed to have Gaussian  
 41 measurement error given by  $\mathcal{N}(0, \sigma^2 \mathbf{I})$ . Note the posterior measure as written above implicitly conditions on PDE parameters  
 42  $\Lambda$ , and covariance parameters  $\theta$ .

43 In order to permit computation, however, we need to project from the infinite dimensional Sobolev space to a finite  
 44 dimensional subset  $U_h$  and do the same for the testing functions (i.e. projecting to  $V_h \subset H_0^1(\Omega)$ ). One can take the projection  
 45 operator  $P_M u = \sum_{i=1}^M u_i \phi_i(x)$  and project to a finite-dimensional subset of a basis  $\{\phi_i\}_i$  and thus as in the introduction we  
 46 discretize:  $u_h(x) = \sum_{i=1}^M u_{h,i} \phi_i(x)$ ,  $v_h(x) = \sum_{i=1}^M v_{h,i} \psi_i(x)$ , and

$$47 \quad \mathcal{A}_\Lambda(u_h, \psi_j) = \langle f, \psi_j \rangle + \langle \xi_\theta, \psi_j \rangle.$$

48 This then defines the (now finite-dimensional) Gaussian measure over the vector of FEM coefficients  $\mathbf{u} = (u_{h,1}, u_{h,2}, \dots)^\top$ :

$$49 \quad p(\mathbf{u} \mid \Lambda, \theta) = \mathcal{N}(\mathbf{A}^{-1} \mathbf{b}, \mathbf{A}^{-1} \mathbf{G}(\theta) \mathbf{A}^{-\top}),$$

50 where  $\mathbf{A}_{ij} = \mathcal{A}_\Lambda(\phi_i, \psi_j)$ ,  $\mathbf{b}_i = \langle f, \psi_i \rangle$ , and  $\mathbf{G}(\theta)_{ij} = \langle \phi_i, C_\theta \psi_j \rangle$ . We write this as shorthand  $p(\mathbf{u} \mid \theta, \Lambda) = \mathcal{N}(\mathbf{m}_u, \mathbf{C}_u)$ .

51 The full covariance matrix  $\mathbf{G}(\theta)$  can be written as

$$52 \quad \mathbf{G}(\theta)_{ij} = \int_{\Omega} \psi_i(x) \int_{\Omega} k_\theta(x, x') \psi_j(x') dx' dx.$$

53 This covariance kernel can be chosen to encode information about the spatial variation of the process. For example, assuming  
 54 that forcing is smooth in space means the popular squared exponential covariance kernel may be appropriate (we have used this  
 55 covariance in all of our examples). There is a vast literature on covariance kernels; see (3), Chapter 4, for a thorough treatment.

56 Arrival of data  $\mathbf{y}$  with some measurement error process  $\eta$  can be written as

$$57 \quad \mathbf{y} = \mathbf{H} \mathbf{u} + \eta, \quad \eta \sim \mathcal{N}(\mathbf{0}, \sigma^2 \mathbf{I}),$$

where  $\mathbf{H} : \mathbb{R}^M \rightarrow \mathbb{R}^N$  is the now finite-dimensional linear observation operator. The finite-dimensional Bayes theorem gives the  
 posterior distribution over the FEM coefficients

$$p(\mathbf{u} \mid \mathbf{y}, \theta, \sigma, \Lambda) \propto p(\mathbf{y} \mid \mathbf{u}, \sigma) p(\mathbf{u} \mid \theta, \Lambda) \\ = \mathcal{N}(\mathbf{m}, \mathbf{C}),$$

58 in which

$$59 \quad \mathbf{m} = \mathbf{m}_u + \mathbf{C}_u \mathbf{H}^\top (\mathbf{H} \mathbf{C}_u \mathbf{H}^\top + \sigma^2 \mathbf{I})^{-1} (\mathbf{y} - \mathbf{H} \mathbf{m}_u),$$

$$60 \quad \mathbf{C} = \mathbf{C}_u - \mathbf{C}_u \mathbf{H}^\top (\mathbf{H} \mathbf{C}_u \mathbf{H}^\top + \sigma^2 \mathbf{I})^{-1} \mathbf{H} \mathbf{C}_u.$$

61 We note that throughout this paper that this should really be also conditional on the differential operators and forcing functions  
 62 that form the dynamics, but this conditioning is taken as implicit so as to avoid cumbersome notation.

63 Parameters  $\theta$  are estimated from the log-marginal likelihood  $p(\mathbf{y} \mid \theta, \sigma, \Lambda) = \mathcal{N}(\mathbf{H} \mathbf{m}_u, \mathbf{H} \mathbf{C}_u \mathbf{H}^\top + \sigma^2 \mathbf{I})$  using either sampling  
 64 or optimization based approaches depending on the need for uncertainty quantification.

## 65 2. Linear, time-dependent statFEM

66 Now we consider the parabolic time-dependent problem:

$$67 \quad \begin{cases} \partial_t u + L_\Lambda u = f + \xi_\theta, & \xi_\theta \sim \mathcal{GP}(0, k_\theta(x, x') \cdot \delta(t - t')), \\ u := u(x), f := f(x), x \in \Omega \subset \mathbb{R}^d, & t \in [0, T]. \end{cases}$$

68 For mathematical simplicity we take the separable covariance function

$$69 \quad \mathbb{E} [\xi_\theta(x, t) \xi_\theta(x', t')] = k_\theta(x, x') \cdot \delta(t, t'). \quad [2]$$

70 Which has the implication that stochastic forcing is white noise in time and spatially regular as per  $k_\theta(\cdot, \cdot)$ . We start by making  
 71 a spatial discretization of the above with finite elements to give the semidiscrete problem and then use finite difference methods  
 72 to give the fully discrete problem (see e.g. (4)). We start with the very similar weak form (with  $u \in U$ ,  $\psi \in V$ ):

$$73 \quad \langle u_t, \psi \rangle + \mathcal{A}_\Lambda(u, \psi) = \langle f, \psi \rangle + \langle \xi_\theta, \psi \rangle,$$

74 and project into finite dimensional subsets  $U_h \subset U$ ,  $V_h \subset V$ , using finite elements  $u_h(x, t) = \sum_{i \in I} u_{h,i}(t) \phi_i(x)$ ,  $v_h(x, t) =$   
 75  $\sum_{i \in I} v_{h,i}(t) \psi_i(x)$ , to give the system of ODEs:

$$76 \quad \langle \partial_t u_h, \psi_j \rangle + \mathcal{A}_\Lambda(u_h, \psi_j) = \langle f, \psi_j \rangle + \langle \xi_\theta, \psi_j \rangle, \quad j \in I.$$

The covariance of  $\langle \xi_\theta, \psi_j \rangle$  is defined by:

$$\mathbb{E}[\langle \xi_\theta, \psi_i \rangle \langle \xi_\theta, \psi_j \rangle] = \delta(t, t') \int_{\Omega} \psi_i(x) \int_{\Omega} k(x, x') \psi_j(x') dx dx'.$$

Which implies that the Gaussian process  $\boldsymbol{\xi}_t = (\langle \xi, \psi_1 \rangle, \langle \xi, \psi_2 \rangle, \dots)^\top$  can be described by:

$$\begin{aligned} \mathbb{E}[\boldsymbol{\xi}_t] &= \mathbf{0}, \\ \mathbb{E}[\boldsymbol{\xi}_t \boldsymbol{\xi}_{t'}^\top] &= \delta(t, t') \cdot \mathbf{G}(\theta), \\ \mathbf{G}(\theta)_{ij} &= \int_{\Omega} \psi_i(x) \int_{\Omega} k_\theta(x, x') \psi_j(x') dx' dx. \end{aligned}$$

This  $\boldsymbol{\xi}_t$  can be informally thought of as the derivative of a Brownian motion process  $\beta_t$  with diffusion matrix  $\mathbf{G}$  (5).

We can concatenate the FEM coefficients into a vector  $\mathbf{u} = (u_1(t), u_2(t), \dots)^\top$  to write the above as a vector SDE:

$$\mathbf{M} d\mathbf{u} + \mathbf{A} \mathbf{u} dt = \mathbf{b} dt + d\beta_t,$$

where  $\mathbf{M}_{ij} = \langle \phi_i, \psi_j \rangle$  (the mass matrix) and  $\mathbf{A}$  and  $\mathbf{b}$  are as above. Next making a time discretization,  $\mathbf{u}^n = (u_1(n\Delta_t), u_2(n\Delta_t), \dots)^\top$ , and using an explicit Euler discretization, one can write:

$$\mathbf{M}(\mathbf{u}^n - \mathbf{u}^{n-1}) + \Delta_t \mathbf{A} \mathbf{u}^{n-1} = \Delta_t \mathbf{b} + \mathbf{e}_{n-1},$$

in which  $\mathbf{e}_{n-1} = \beta_n - \beta_{n-1} \sim \mathcal{N}(0, \Delta_t \mathbf{G}(\theta_n))$  are i.i.d. Gaussian (timesteps are assumed equal through the simulation). The implicit Euler follows

$$\mathbf{M}(\mathbf{u}^n - \mathbf{u}^{n-1}) + \Delta_t \mathbf{A} \mathbf{u}^n = \Delta_t \mathbf{b} + \mathbf{e}_{n-1},$$

so too the Crank-Nicolson

$$\mathbf{M}(\mathbf{u}^n - \mathbf{u}^{n-1}) + \Delta_t \mathbf{A} \mathbf{u}^{n+1/2} = \Delta_t \mathbf{b} + \mathbf{e}_{n-1},$$

where  $\mathbf{u}^{n+1/2} := (\mathbf{u}^{n+1} + \mathbf{u}^n)/2$ .

For exposition let us look at the the explicit Euler method for which the updating equation can be written as

$$\mathbf{u}^n = (\mathbf{I} - \Delta_t \mathbf{M}^{-1} \mathbf{A}) \mathbf{u}^{n-1} + \Delta_t \mathbf{M}^{-1} \mathbf{b} + \mathbf{M}^{-1} \mathbf{e}_{n-1},$$

which defines the conditional measure at time  $n$  to be

$$\mathbf{u}^n | \mathbf{u}^{n-1}, \theta_n, \Lambda \sim \mathcal{N}\left(\left(\mathbf{I} - \Delta_t \mathbf{M}^{-1} \mathbf{A}\right) \mathbf{u}^{n-1} + \Delta_t \mathbf{M}^{-1} \mathbf{b}, \Delta_t \mathbf{M}^{-1} \mathbf{G}(\theta_n) \mathbf{M}^{-\top}\right).$$

The data are arriving at each timestep in the form  $\mathbf{y}_n = \mathbf{H}_n \mathbf{u}^n + \boldsymbol{\eta}_n$  and have some Gaussian additive noise  $\boldsymbol{\eta}_n \sim \mathcal{N}(\mathbf{0}, \sigma_n^2 \mathbf{I})$ . This is a high-dimensional linear Gaussian state space problem. This class of models have been well studied (6) and one can apply standard Kalman filtering methods to obtain the filtering distribution  $p(\mathbf{u}^n | \mathbf{y}_{1:n}, \theta_{1:n}, \sigma_{1:n}, \Lambda)$ . We denote by  $\mathbf{m}_{n|n-1}$  the posterior mean at time  $n$  conditional on data up to and including time  $n-1$ . The covariance also follows this notation. Under the assumption of unknown parameters  $\theta$ , and a known previous filtering distribution,  $\mathbf{u}^{n-1} | \mathbf{y}_{1:n-1}, \theta_{1:n-1}, \sigma_{1:n-1}, \Lambda \sim \mathcal{N}(\mathbf{m}_{n|n-1}, \mathbf{C}_{n|n-1})$ , the filtering proceeds as:

1. Predict:

$$\begin{aligned} \mathbf{m}_{n|n-1} &= (\mathbf{I} - \Delta_t \mathbf{M}^{-1} \mathbf{A}) \mathbf{m}_{n-1|n-1} + \Delta_t \mathbf{M}^{-1} \mathbf{b}, \\ \hat{\mathbf{C}}_{n|n-1} &= (\mathbf{I} - \Delta_t \mathbf{M}^{-1} \mathbf{A}) \mathbf{C}_{n-1|n-1} (\mathbf{I} - \Delta_t \mathbf{M}^{-1} \mathbf{A})^\top. \end{aligned}$$

2. Estimate  $\theta_n, \sigma_n$ :

$$\begin{aligned} &\arg \max_{\theta_n, \sigma_n} \{\log p(\mathbf{y}_n | \mathbf{y}_{1:n-1}, \theta_{1:n}, \sigma_{1:n}) + \log p(\theta_n) + \log p(\sigma_n)\} \\ p(\mathbf{y}_n | \mathbf{y}_{1:n-1}, \theta_{1:n}, \sigma_{1:n}) &= \mathcal{N}\left(\mathbf{H}_n \mathbf{m}_{n|n-1}, \mathbf{H}_n \hat{\mathbf{C}}_{n|n-1} \mathbf{H}_n^\top + \mathbf{H}_n \hat{\mathbf{G}}(\theta_n) \mathbf{H}_n^\top + \sigma_n^2 \mathbf{I}\right), \end{aligned}$$

where  $\hat{\mathbf{G}}(\theta_n) = \Delta_t \mathbf{M}^{-1} \mathbf{G}(\theta_n) \mathbf{M}^{-\top}$ .

3. Update using the estimated  $\theta_n$ :

$$\mathbf{C}_{n|n-1} = \hat{\mathbf{C}}_{n|n-1} + \hat{\mathbf{G}}(\theta_n).$$

4. Condition:

$$\begin{aligned} \mathbf{m}_{n|n} &= \mathbf{m}_{n|n-1} + \mathbf{C}_{n|n-1} \mathbf{H}_n^\top \left(\mathbf{H}_n \mathbf{C}_{n|n-1} \mathbf{H}_n^\top + \sigma_n^2 \mathbf{I}\right)^{-1} (\mathbf{y}_n - \mathbf{H}_n \mathbf{m}_{n|n-1}), \\ \mathbf{C}_{n|n} &= \mathbf{C}_{n|n-1} - \mathbf{C}_{n|n-1} \mathbf{H}_n^\top \left(\mathbf{H}_n \mathbf{C}_{n|n-1} \mathbf{H}_n^\top + \sigma_n^2 \mathbf{I}\right)^{-1} \mathbf{H}_n \mathbf{C}_{n|n-1}. \end{aligned}$$

Thus  $p(\mathbf{u}^n | \mathbf{y}_{1:n}, \theta_{1:n}, \sigma_{1:n}, \Lambda) = \mathcal{N}(\mathbf{m}_{n|n}, \mathbf{C}_{n|n})$ .

### 116 3. Nonlinear, time-dependent statFEM

117 A general nonlinear PDE with stochastic forcing can be expressed as:

$$118 \begin{cases} \partial_t u + L_\Lambda u + F_\Lambda(u) + \xi_\theta = 0, & \xi \sim \mathcal{GP}(0, k_\theta(x, x') \cdot \delta(t - t')), \\ u := u(x, t), & x \in \Omega \subset \mathbb{R}^d, \quad t \in [0, T]. \end{cases} \quad [3]$$

119 The nonlinear statFEM construction is then as follows, assuming the separable covariance structure as in Eq. (2). As previous  
120 we start with the spatial discretization to give a semidiscrete problem (a vector SDE) and then proceed to the fully discrete  
121 solution via finite differences in time. We begin by multiplying by test functions  $\psi \in V$  and integrating over the problem  
122 domain.

$$123 \langle \partial_t u, \psi \rangle + \langle L_\Lambda u, \psi \rangle + \langle F_\Lambda(u), \psi \rangle + \langle \xi_\theta, \psi \rangle = 0.$$

124 We next divide the domain  $\Omega$  into finite elements on a given mesh and look for solutions in terms of a finite set of trial  
125 functions  $\{\phi_i\}_{i \in I}$  against test functions  $\{\psi_i\}_{i \in I}$  as before. We expand solutions in terms of these basis functions,  $u_h(x, t) =$   
126  $\sum_{i \in I} u_{h,i}(t)\phi_i(x)$ , to give the updated weak form:

$$127 \langle \partial_t u_h, \psi_j \rangle + \langle L_\Lambda u_h, \psi_j \rangle + \langle F_\Lambda(u_h), \psi_j \rangle + \langle \xi_\theta, \psi_j \rangle = 0,$$

128 which now defines a nonlinear, coupled system of stochastic differential equations. In general one can make no comment on the  
129 distributional form of the resultant probability measure on function space due to the nonlinear  $F_\Lambda$ . Following the derivations  
130 given in the linear case above we can write this system as a nonlinear vector SDE:

$$131 \mathbf{M} d\mathbf{u} + \mathcal{F}_\Lambda(\mathbf{u})dt + d\beta_t = 0,$$

132 where  $\mathbf{M}$  is the mass matrix and  $\mathcal{F}_\Lambda$  is some nonlinear vector function that encodes the action of  $L_\Lambda$  and  $F_\Lambda$ .

133 Now, we discretize in time using Euler methods. The explicit Euler method at  $\mathbf{u}^n := \mathbf{u}(n\Delta_t)$  gives

$$134 \mathbf{M}(\mathbf{u}^n - \mathbf{u}^{n-1}) + \Delta_t \mathcal{F}_\Lambda(\mathbf{u}^{n-1}) + \mathbf{e}_{n-1} = 0,$$

135 in which  $\mathbf{e}_{n-1} = \beta_n - \beta_{n-1} \sim \mathcal{N}(0, \Delta_t \mathbf{G}(\theta))$  are i.i.d. Gaussian (timesteps are equal through the simulation). We can also use  
136 the implicit Euler

$$137 \mathbf{M}(\mathbf{u}^n - \mathbf{u}^{n-1}) + \Delta_t \mathcal{F}_\Lambda(\mathbf{u}^n) + \mathbf{e}_{n-1} = 0,$$

138 or the Crank-Nicolson

$$139 \mathbf{M}(\mathbf{u}^n - \mathbf{u}^{n-1}) + \Delta_t \mathcal{F}_\Lambda(\mathbf{u}^{n+1/2}) + \mathbf{e}_{n-1} = 0,$$

140 with  $\mathbf{u}^{n+1/2} := (\mathbf{u}^{n+1} + \mathbf{u}^n)/2$ , if stability of the time integration is needed. We can represent the above as some nonlinear  
141 updating equation:

$$142 \mathcal{F}_\Lambda(\mathbf{u}^n, \mathbf{u}^{n-1}) + \mathbf{e}_{n-1} = 0,$$

143 recycling the notation for the nonlinear vector-valued function  $\mathcal{F}_\Lambda$ . This system of equations requires solving at each timestep  
144 (via linear solvers or nonlinear Newton/quasi-Newton methods) and the solution will define the prior over the FEM coefficients  
145 at each time  $n\Delta_t$ . Obviously there is much development required to go from the weak form to having a timestepping regime in  
146 terms of the FEM coefficients, however for brevity we will just deal with the above (or variants thereof). Statisticians will note  
147 that from here on in we are essentially studying a high-dimensional nonlinear state-space model. We now turn to describing  
148 the data assimilation procedure.

### 149 4. Computing the posterior

150 Now, having the prior, we wish to condition on data to yield the posterior  $p(\mathbf{u}^n | \mathbf{y}_{1:n}, \theta_{1:n}, \sigma_{1:n}, \Lambda)$ , describing the belief in  
151 the FEM solution conditioned on data observed up to and including time  $n\Delta_t$ . We begin by stipulating the data generating  
152 process as, at each  $n$ ,  $\mathbf{y}_n = \mathbf{H}_n \mathbf{u}^n + \boldsymbol{\eta}_n$  in which

- 153 •  $\mathbf{y}_n \in \mathbb{R}^N$  is the observed data at time  $n\Delta_t$ .
- 154 •  $\mathbf{H}_n : \mathbb{R}^M \rightarrow \mathbb{R}^N$  is the observation operator that maps from the FEM solution mesh to the observed points  $\mathbf{x}_{\text{obs}}$ .
- 155 •  $\mathbf{u}^n \in \mathbb{R}^M$  is the FEM coefficients at time  $n$ .
- 156 •  $\boldsymbol{\eta}_n$  is a noise process that represents the measurement error for the observed values. This is a Gaussian  $\boldsymbol{\eta}_n \sim \mathcal{N}(\mathbf{0}, \sigma_n^2 \mathbf{I})$   
157 and thus so is the likelihood  $p(\mathbf{y}_n | \mathbf{u}^n, \sigma_n, \Lambda) = \mathcal{N}(\mathbf{H}_n \mathbf{u}^n, \sigma_n^2 \mathbf{I})$ .

158 **A. Extended Kalman filter (EKF).** At time  $n$  we start with the previous filtering distribution

$$159 \quad p(\mathbf{u}^{n-1} \mid \mathbf{y}_{1:n-1}, \theta_{1:n-1}, \sigma_{1:n-1}, \Lambda) \sim \mathcal{N}(\mathbf{m}_{n-1|n-1}, \mathbf{C}_{n-1|n-1}),$$

160 then proceed as follows

- 161 1. Compute the prediction step for the mean by solving

$$162 \quad \mathcal{F}_\Lambda(\mathbf{m}_{n|n-1}, \mathbf{m}_{n-1|n-1}) = \mathbf{0},$$

163 for  $\mathbf{m}_{n|n-1}$ , and computing the so-called forward covariance:

$$164 \quad \hat{\mathbf{C}}_{n|n-1} = (\mathbf{J}^n)^{-1} (\mathbf{J}^{n-1} \mathbf{C}_{n-1|n-1} (\mathbf{J}^{n-1})^\top) (\mathbf{J}^n)^{-\top},$$

165 The Jacobians  $\mathbf{J}^n = \frac{\partial}{\partial \mathbf{u}^n} \mathcal{F}_\Lambda(\mathbf{u}^n, \mathbf{u}^{n-1})$ ,  $\mathbf{J}^{n-1} = \frac{\partial}{\partial \mathbf{u}^{n-1}} \mathcal{F}_\Lambda(\mathbf{u}^n, \mathbf{u}^{n-1})$  are evaluated at the solutions  $\mathbf{m}_{n|n-1}$ ,  $\mathbf{m}_{n-1|n-1}$ .  
 166 The reason we do this “half” prediction step is that the parameters  $\theta_n$  are as yet unknown and must be estimated. The  
 167 full prediction covariance is written as:

$$168 \quad \mathbf{C}_{n|n-1} = \hat{\mathbf{C}}_{n|n-1} + \Delta_t (\mathbf{J}^n)^{-1} \mathbf{G}(\theta_n) (\mathbf{J}^n)^{-\top}.$$

- 169 2. Maximize the log-marginal posterior

$$170 \quad \max_{\theta_n, \sigma_n} \{ \log p(\mathbf{y}_n \mid \mathbf{y}_{1:n-1}, \theta_{1:n}, \sigma_{1:n}, \Lambda) + \log p(\theta_n) + \log p(\sigma_n) \}$$

171 to obtain estimated parameters  $\theta_n$ ,  $\sigma_n$ . The marginal likelihood can be written out as:

$$172 \quad p(\mathbf{y}_n \mid \mathbf{y}_{1:n-1}, \theta_{1:n}, \sigma_{1:n}, \Lambda) = \mathcal{N}(\mathbf{H}_n \mathbf{m}_{n|n-1}, \mathbf{H}_n \hat{\mathbf{C}}_{n|n-1} \mathbf{H}_n^\top + \Delta_t \mathbf{H}_n \hat{\mathbf{G}}(\theta_n) \mathbf{H}_n^\top + \sigma_n^2 \mathbf{I})$$

173 where

$$174 \quad \hat{\mathbf{G}}(\theta_n) = (\mathbf{J}^n)^{-1} \mathbf{G}(\theta_n) (\mathbf{J}^n)^{-\top}.$$

175 In this form we can calculate derivatives of marginal likelihood covariance — using well-known formulae from Gaussian  
 176 process regression (see (3), Chapter 5).

- 177 3. Using the estimated  $\theta_n$ , compute the full prediction covariance  $\mathbf{C}_{n|n-1}$ :

$$178 \quad \mathbf{C}_{n|n-1} = \hat{\mathbf{C}}_{n|n-1} + \Delta_t \hat{\mathbf{G}}(\theta_n).$$

4. Complete a standard Kalman update, conditioning on  $\mathbf{y}_n$ :

$$\begin{aligned} p(\mathbf{u}^n \mid \mathbf{y}_{1:n}, \theta_{1:n}, \sigma_{1:n}, \Lambda) &\propto p(\mathbf{y}_n \mid \mathbf{u}^n, \sigma_n) p(\mathbf{u}^n \mid \mathbf{y}_{1:n-1}, \theta_{1:n}, \Lambda) \\ &= \mathcal{N}(\mathbf{m}_{n|n}, \mathbf{C}_{n|n}). \end{aligned}$$

where

$$\begin{aligned} \mathbf{m}_{n|n} &= \mathbf{m}_{n|n-1} + \mathbf{C}_{n|n-1} \mathbf{H}_n^\top (\mathbf{H}_n \mathbf{C}_{n|n-1} \mathbf{H}_n^\top + \sigma_n^2 \mathbf{I})^{-1} (\mathbf{y}_n - \mathbf{H}_n \mathbf{m}_{n|n-1}), \\ \mathbf{C}_{n|n} &= \mathbf{C}_{n|n-1} - \mathbf{C}_{n|n-1} \mathbf{H}_n^\top (\mathbf{H}_n \mathbf{C}_{n|n-1} \mathbf{H}_n^\top + \sigma_n^2 \mathbf{I})^{-1} \mathbf{H}_n \mathbf{C}_{n|n-1}. \end{aligned}$$

179 **B. Ensemble Kalman filter (EnKF).** At time  $n$  we start with the previous filtering distribution, which with  $N_{ens}$  ensemble  
 180 members, is described by:

$$181 \quad \{\mathbf{u}^{n-1, [i]}\}_i \sim p(\mathbf{u}^{n-1} \mid \mathbf{y}_{1:n-1}, \theta_{1:n-1}, \sigma_{1:n-1}, \Lambda).$$

182 Then proceed as follows

- 183 1. Compute the prediction step (without simulating stochastic forcing) for each  $i = 1, \dots, N_{ens}$

$$184 \quad \mathcal{F}_\Lambda(\mathbf{u}^{n, [i]}, \mathbf{u}^{n-1, [i]}) = \mathbf{0},$$

185 and computing the so-called forward covariance:

$$186 \quad \hat{\mathbf{C}}_{n|n-1} = \frac{1}{N_{ens} - 1} \sum_{i=1}^{N_{ens}} (\mathbf{u}^{n, [i]} - \mathbf{m}_{n|n-1}) (\mathbf{u}^{n, [i]} - \mathbf{m}_{n|n-1})^\top$$

187 where  $\mathbf{m}_{n|n-1} = \frac{1}{N_{ens}} \sum_{i=1}^{N_{ens}} \mathbf{u}^{n, [i]}$ . The reason we do this “half” prediction step is that the parameters  $\theta_n$  are as yet  
 188 unknown and must be estimated. The full prediction covariance is approximated as

$$189 \quad \mathbf{C}_{n|n-1} = \hat{\mathbf{C}}_{n|n-1} + \Delta_t (\mathbf{J}^n)^{-1} \mathbf{G}(\theta_n) (\mathbf{J}^n)^{-\top},$$

190 where we employ this approximation in order to use analytical gradients in the optimization step.

191 2. Maximize the log-marginal posterior

$$192 \quad \max_{\theta_n, \sigma_n} \{ \log p(\mathbf{y}_n | \mathbf{y}_{1:n-1}, \theta_{1:n}, \sigma_{1:n}, \Lambda) + \log p(\theta_n) + \log p(\sigma_n) \}$$

193 to obtain estimated parameters  $\theta_n, \sigma_n$ . The marginal likelihood can be written out as:

$$194 \quad p(\mathbf{y}_n | \mathbf{y}_{1:n-1}, \theta_{1:n}, \sigma_{1:n}, \Lambda) = \mathcal{N}(\mathbf{H}_n \mathbf{m}_{n|n-1}, \mathbf{H}_n \hat{\mathbf{C}}_{n|n-1} \mathbf{H}_n^\top + \Delta_t \mathbf{H}_n \hat{\mathbf{G}}(\theta_n) \mathbf{H}_n^\top + \sigma_n^2 \mathbf{I})$$

195 where  $\hat{\mathbf{G}}(\theta_n) = (\mathbf{J}^n)^{-1} \mathbf{G}(\theta_n) (\mathbf{J}^n)^{-\top}$ .

196 3. Using  $\theta_n$ , compute the full prediction step:

$$197 \quad \mathcal{F}_\Lambda(\mathbf{u}^{n,[i]}, \mathbf{u}^{n-1,[i]}) + \mathbf{e}_{n-1}^{[i]} = \mathbf{0},$$

198 for the predictions  $\{\mathbf{u}^{n,[i]}\}_i$ .

199 4. Then update the ensemble members by a Kalman shift

$$200 \quad \mathbf{u}^{n,[i]} = \mathbf{u}^{n,[i]} + \mathbf{C}_{n|n-1} \mathbf{H}_n^\top (\mathbf{H}_n \mathbf{C}_{n|n-1} \mathbf{H}_n^\top + \sigma_y^2 \mathbf{I})^{-1} (\mathbf{y}_n + \boldsymbol{\eta}_n^{[i]} - \mathbf{H}_n \mathbf{u}^{n,[i]}),$$

$$201 \quad \mathbf{C}_{n|n-1} = \frac{1}{N_{ens} - 1} \sum_{i=1}^{N_{ens}} (\mathbf{u}^{n,[i]} - \mathbf{m}_{n|n-1}) (\mathbf{u}^{n,[i]} - \mathbf{m}_{n|n-1})^\top, \quad \mathbf{m}_{n|n-1} = \frac{1}{N_{ens}} \sum_{i=1}^{N_{ens}} \mathbf{u}^{n,[i]},$$

202 to give the posterior ensemble  $\{\mathbf{u}^{n,[i]}\}_i \sim p(\mathbf{u}^n | \mathbf{y}_{1:n}, \theta_n, \sigma_n, \Lambda)$ .

**C. Discussion of the method.** Discretization of the covariance  $\mathbf{G}(\theta)$  requires some care to implement as this is a  $2d$  dimensional integral and in general does not give a sparse matrix as  $C_\theta$  is a positive definite integral operator on Hilbert space. For large problems it may be necessary to impose some sort of sparsity constraint. This can be done e.g. by assuming space-time white noise to give

$$\begin{aligned} \mathbf{G}(\theta)_{ij} &= \langle \psi_i, C_\theta \psi_j \rangle = \int_{\Omega} \psi_i(x) \int_{\Omega} \delta(x, x') \psi_j(x') dx' dx \\ &= \int_{\Omega} \psi_i(x) \psi_j(x) dx = \mathbf{M}_{ij}, \end{aligned}$$

204 so the mass matrix  $\mathbf{M}$  is the covariance matrix. Localization (see, e.g., (7)) may also be used to enforce a sparsity constraint and remove spurious correlations that may arise from small ensemble sizes (if the ensemble method is used). Brute force setting entries to zero, below some threshold value, could also be used.

205 Furthermore often products of the form  $\mathbf{A}^{-1} \mathbf{G}(\theta) \mathbf{A}^{-\top}$  must be formed. If taking a truncated eigendecomposition of  $\mathbf{G}(\theta)$  is not too problematic (using e.g. Lanczos iterations (8)) then one can approximate

$$206 \quad \mathbf{A}^{-1} \mathbf{G}(\theta) \mathbf{A}^{-\top} \approx \mathbf{A}^{-1} \mathbf{Q} \mathbf{D} \mathbf{Q}^\top \mathbf{A}^{-\top} = (\mathbf{A}^{-1} \mathbf{Q}) \mathbf{D} (\mathbf{A}^{-1} \mathbf{Q})^\top,$$

207 meaning many of matrix solves of  $\mathbf{A}$  can be avoided by taking this low-rank approximation. This may be especially beneficial when  $\mathbf{G}(\theta)$  has some additional structure than can be made use of to quickly compute its eigendecomposition (e.g. sparsity or Toeplitz structure).

208 The parameters  $\theta_n$  and  $\sigma_n$  require estimation at each time  $n$  and are assumed to be independent across time. They are estimated by maximizing the log-marginal posterior (3).\*

$$209 \quad \log p(\theta_n, \sigma_n | \mathbf{y}_{1:n}, \theta_{1:n-1}, \sigma_{1:n-1}) \propto \log p(\mathbf{y}_n | \mathbf{y}_{1:n-1}, \theta_{1:n}, \sigma_{1:n}) + \log p(\theta_n) + \log p(\sigma_n)$$

210 where the marginal likelihood at time  $n$  is approximated with the EKF approximation

$$211 \quad p(\mathbf{y}_n | \mathbf{y}_{1:n-1}, \theta_n, \sigma_n, \Lambda) = \mathcal{N}(\mathbf{H}_n \mathbf{m}_{n|n-1}, \mathbf{H}_n \hat{\mathbf{C}}_{n|n-1} \mathbf{H}_n^\top + \Delta_t \mathbf{H}_n \hat{\mathbf{G}}(\theta_n) \mathbf{H}_n^\top + \sigma_n^2 \mathbf{I}).$$

212 Unless otherwise mentioned we use the priors

$$213 \quad \tau_n \sim \mathcal{N}_+(1, 1^2), \quad \ell_n \sim \mathcal{N}_+(1, 1^2), \quad \sigma_n \sim \mathcal{N}_+(0, 1^2). \quad [4]$$

214 We choose to introduce prior information in order to regularize the optimization problem. Anecdotally, appropriate choices of these priors makes the optimization much better-behaved.

215 If parameters are assumed to be constant across time then the updating procedures provided above could be modified to account for this. One possibility is outlined in (6) and is based on optimizing the full likelihood:

$$216 \quad \log p(\mathbf{y}_{1:N} | \theta, \sigma) = -\frac{1}{2} \sum_{n=1}^N \log |\boldsymbol{\Sigma}_n(\theta, \sigma)| - \frac{1}{2} \sum_{n=1}^N (\mathbf{y}_n - \mathbf{H}_n \mathbf{m}_{n|n-1})^\top \boldsymbol{\Sigma}_n(\theta, \sigma)^{-1} (\mathbf{y}_n - \mathbf{H}_n \mathbf{m}_{n|n-1}),$$

217 in which  $\boldsymbol{\Sigma}_n(\theta, \sigma) = \mathbf{H}_n \hat{\mathbf{C}}_{n|n-1} \mathbf{H}_n^\top + \Delta_t \mathbf{H}_n \hat{\mathbf{G}}(\theta) \mathbf{H}_n^\top + \sigma^2 \mathbf{I}$ . One could use the above filtering algorithms with fixed parameters to evaluate this likelihood, also analytically calculating gradients on the way through. Priors can also be incorporated. Optimization can then proceed via standard methods (e.g. L-BFGS-B as we use for the marginal likelihood) noting that each likelihood (and gradient) evaluation requires computing the filtered distribution  $p(\mathbf{u}^N | \mathbf{y}_{1:N}, \theta, \sigma)$  for fixed parameters  $\theta$  and  $\sigma$ .

\*Using Gaussian priors gives the Tikhonov regularization of the marginal likelihood. Other priors are also commonly used, see e.g. Chapter 10 of (9)

## 229 5. statFEM for KdV

230 We now illustrate the above using the eKdV equation, given by

$$231 \begin{cases} u_t + \alpha uu_x + \beta u_{xxx} + cu_x + \nu u + \xi_\theta = 0, \\ u := u(x, t), \quad x \in [0, L], \quad t \in [0, T], \\ u(x, t) = u(x + L, t), \\ u(x, 0) := u_0(x). \end{cases}$$

232 For the deterministic problem, we discretize using the scheme outlined in (10). Start by defining the time grid as  $n_t$  evenly  
233 spaced points  $(0, \Delta_t, 2\Delta_t, \dots, (n_t - 1)\Delta_t)^\top$ , with  $u^n(x) = u(x, n\Delta_t)$ . We use Crank-Nicolson for time integration and continue  
234 as usual by multiplying with test functions  $\psi \in V^0$  ( $V^0$  some appropriate function space) and integrating with respect to  $x$   
235 over  $[0, L]$  to give the weak form

$$236 \langle u^{n+1} - u^n, \psi \rangle + \Delta_t \alpha \langle u^{n+1/2} u_x^{n+1/2}, \psi \rangle + \Delta_t \beta \langle u_{xxx}^{n+1/2}, \psi \rangle + \Delta_t c \langle u_x^{n+1/2}, \psi \rangle + \Delta_t \nu \langle u^{n+1/2}, \psi \rangle + \langle \xi_\theta^n - \xi_\theta^{n-1}, \psi \rangle = 0.$$

Where  $\xi_\theta^n - \xi_\theta^{n-1} \sim \mathcal{GP}(0, \Delta_t k_\theta(x, x'))$  with  $k$  a squared-exponential kernel. To minimize the order of derivatives split the  
above into a system of three first order equations:

$$\begin{aligned} \langle u^{n+1} - u^n, \psi \rangle + \Delta_t \alpha \langle u^{n+1/2} u_x^{n+1/2}, \psi \rangle + \Delta_t \beta \langle w_x^{n+1/2}, \psi \rangle + \Delta_t c \langle u_x^{n+1/2}, \psi \rangle + \Delta_t \nu \langle u^{n+1/2}, \psi \rangle + \langle \xi_\theta^n - \xi_\theta^{n-1}, \psi \rangle &= 0, \\ \langle u_x^{n+1/2}, \psi \rangle &= \langle v^{n+1/2}, \psi \rangle, \\ \langle v_x^{n+1/2}, \psi \rangle &= \langle w^{n+1/2}, \psi \rangle. \end{aligned}$$

237 This is necessary as we use  $P_0$  test functions  $\{\psi_i\}_i$  and  $P_1$  trial functions  $\{\phi_i\}_i$ . The solutions to the deterministic problem  
238 thus reside in the space  $V_h^1 = \text{span}(\{\phi_i\}_i) \subset C^1([0, L])$ .

239 To solve the above system at each time requires the solution of a nonlinear system of equations which is implemented using  
240 Newton's method. Convergence is typically achieved in  $< 5$  Newton iterations. It is noted in (10) that solving the system  
241 directly as opposed to linearizing about previous solutions avoids numerical dissipation present in other schemes. When using  
242 the statFEM for KdV, the covariance  $\mathbf{G}(\theta)$  is evaluated with the trapezoidal rule which is known to be exponentially convergent  
243 for periodic functions (11).

244 **A. FEM approximation convergence.** To compute discretization error estimates for the EKF prior mean we make use of the  
245 fact that KdV is integrable with "nice" expressions of the exact solution  $u(x, t)$  for judicious choice of coefficients and initial  
246 conditions. In this study we chose  $\alpha = 1$ ,  $\beta = 10^{-3}$ , and initial conditions

$$247 u(x, 0) = \frac{3}{2} \text{sech}^2 \left( \frac{1}{2} \sqrt{\frac{1}{2\beta}} (x - 1) \right)$$

248 which gives the analytical solution (assuming that  $u = 0$ ,  $\partial_x u = 0$ , as  $x \rightarrow \pm\infty$ )

$$249 u(x, t) = \frac{3}{2} \text{sech}^2 \left( \frac{1}{2} \sqrt{\frac{1}{2\beta}} \left( x - 1 - \frac{t}{2} \right) \right).$$

250 We solve on  $x \in [0, 3]$  with periodic boundary conditions; this mimics solving on the real line. We compute the  $L^2$  error  
251  $\|u - u_h\|_2$  for FEM discretized solutions  $u_h$  using 200, 400, 600, 800, 1000, and 2000 mesh nodes, after running 100 timesteps  
252 with  $\Delta_t = 10^{-3}$ . The resultant errors are shown in Figure S1a and give error  $\mathcal{O}(h^2)$ , as expected with  $P_1$  elements.

253 **B. Simulation study.** We now present the consistency of the prior for the simulation study. In this case we take the same  
254 settings as in the main text:  $\alpha = 1$ ,  $\beta = 0.01$ ,  $c = 0$ , and investigate the effect of reducing the  $\xi_\theta$  scale parameter  $\tau_n \equiv \tau$  for  
255 equal  $\ell_n \equiv \ell$ . These parameters are assumed constant for all  $n$ . Results are shown in Figure S1b, computed using the EnKF  
256 method, and demonstrate that (a) uncertainty grows as the simulation carries on; and (b) the reduction of the scale parameter  
257  $\tau$  results in the uncertainty bands contracting about the FEM solution. The prior mean converges to the FEM solution as  $\tau$  is  
258 decreased. However there is some damping for larger  $\tau$  values. We posit that damping is due to the dispersive behaviour of  
259 KdV. By perturbing solutions we cause the ensemble members to drift apart as the simulation runs.

260 **C. Experimental data.** We set the noise variance after Fourier filtering the experimental data at the first wave-gauge, attenuating  
261 to the first 100 frequencies only. Estimation of this variance gives the time-averaged constant variance  $\sigma_n^2 \approx 1.3588 \times 10^{-8}$ . In  
262 order to estimate the other hyperparameters we use a projection method to address potential small data problems. At each  
263 timestep, we have three measurements in space, which is less than ideal when trying to learn hyperparameters. To inflate the  
264 dataset we project forward using a least-squares projection:

$$265 y_i^n = a_n + b_n \mathbf{u}^n(x_i),$$



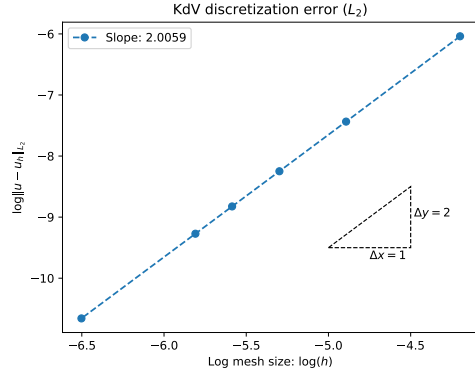

(a) KdV  $L^2$  error estimates.

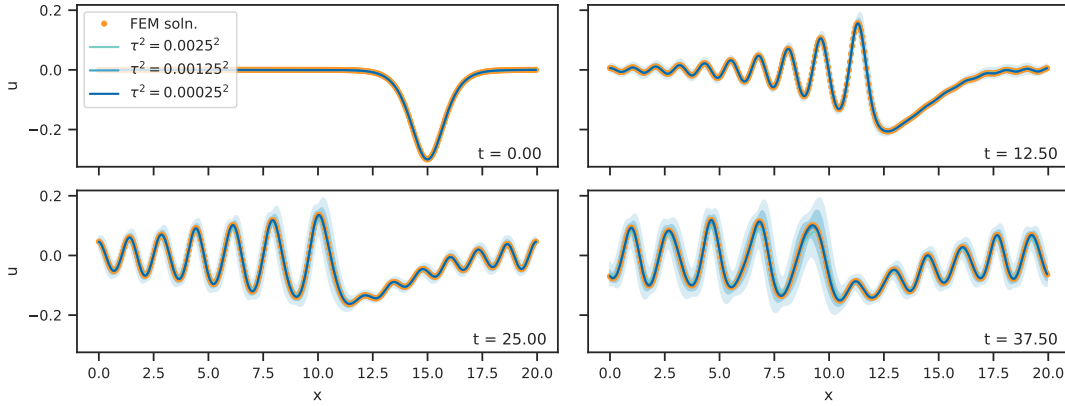

(b) Cubic KdV prior consistency plots.

266 which requires estimating the  $a_n, b_n$  at each iteration. This gives the best least-squares linear projection from the current  
 267 prediction to the data, to give us a predicted dataset  $\tilde{\mathbf{y}}_n$  via using the linear shift:

268 
$$\tilde{\mathbf{y}}_n = a_n + b_n \mathbf{u}^n.$$

Using this method we can extend our dataset to now be as large as our FEM solution grid. In the paper we project to a grid of 100 points, uniformly spaced across the solution grid. This is only for the parameter estimation step. We do not use these values as the data in the analysis/conditioning step of the Kalman filter; we just use this to estimate the parameters, to improve the conditioning of the problem. We use the same weakly informative priors

$$\tau_n \sim \mathcal{N}_+(1, 1^2), \quad \ell_n \sim \mathcal{N}_+(1, 1^2).$$

269 **6. Further examples**

270 In this section we demonstrate the application of the method on a set of PDEs. We use two well-known systems: the  
 271 Kuramoto-Sivashinsky equation and the 2D Burgers' equation. The general theme of this section is that we generate some  
 272 mismatched data and then condition on it after jittering it with synthetic Gaussian observational error. Different to KdV, we  
 273 discretize all equations with Fenics (12) and use the EKF in both examples. Scripts to run these examples are included in the  
 274 accompanying GitHub repository, available at <https://github.com/connor-duffin/statkdv-paper>.

275 **A. Kuramoto-Sivashinsky.** The Kuramoto-Sivashinsky (KS) equation is a chaotic, biharmonic PDE that is used to model  
 276 pattern formation in a variety of physical contexts (13). In this paper we consider the 1D KS equation, which is given by:

277 
$$\begin{cases} u_t + uu_x + \nu u_{xx} + u_{xxxx} = 0, \\ u := u(x, t), \quad x \in [0, 32\pi], \quad t \in [0, 100], \\ u(0, t) = u(32\pi, t). \end{cases} \quad [5]$$

We discretize using  $P_1$  trial and test functions with 512 elements in space, and an implicit Euler timestepping scheme ( $\Delta_t = 0.02$ ). To deal with the fourth order system we split into a system of coupled PDEs (similar to KdV), to give the semi-discrete

(time-discretized) equations

$$\begin{aligned} \langle u^n - u^{n-1}, v \rangle + \Delta_t \langle u^n u_x^n, v \rangle - \Delta_t \nu \langle u_x^n, v_x \rangle - \Delta_t \langle w_x^n, v_x \rangle &= 0, \\ -\langle u_x^n, v_x \rangle - \langle w^n, v \rangle &= 0, \end{aligned}$$

278 for test functions  $v \in V$ .

279 We generate data with an under-damped model, with  $\nu = 0.95$ . StatFEM conditions on 52 observations per timestep, which  
280 have simulated Gaussian error,  $\boldsymbol{\eta}_n \sim \mathcal{N}(0, 0.05^2)$ . For the statFEM model, we assume the standard base model

$$281 \quad u_t + uu_x + u_{xx} + u_{xxx} + \xi_\theta = 0, \quad \xi_\theta \sim \mathcal{GP}(0, C_\theta),$$

in which mismatch is induced by different dissipation magnitudes (0.95 to 1). As before, set the covariance of  $\xi_\theta$  to  $\mathbb{E}[\xi_\theta(x, t)\xi_\theta(x', t')] = k_\theta(x, x') \cdot \delta(t, t')$ , with  $k_\theta$  given by a squared exponential covariance function now with parameters  $\theta_n = (\tau_n, \ell_n)$  and  $\sigma_n$  estimated at each timestep  $n$ . The data generating process is given by  $\mathbf{y}_n = \mathbf{H}\mathbf{u}^n + \boldsymbol{\eta}_n$ ; the data are generated according to the KS model and a measurement error. The initial conditions are set from running the data-generating process (i.e. Eq. (5) for  $\nu = 0.95$ ), initialized with  $u(x, 0) = \sin(x/16)$ , for 2000 timesteps to skip over transient behaviour. In this case to compute the covariance matrix  $\mathbf{G}(\theta_n)$  we approximate

$$\begin{aligned} \mathbf{G}(\theta_n)_{ij} &= \int_{\Omega} \psi_i(x) \int_{\Omega} k_\theta(x, x') \psi_j(x') dx' dx \\ &\approx \sum_m \int_{\Omega} \psi_i(x) \sum_n \int_{\Omega} \psi_m(x) k_\theta(x_m, x_n) \psi_n(x') \psi_j(x') dx' dx \\ &\approx \sum_m \int_{\Omega} \psi_i(x) \psi_m(x) \sum_n \int_{\Omega} k_\theta(x_m, x_n) \psi_n(x') \psi_j(x') dx' dx \\ &= \sum_m \mathbf{M}_{im} \sum_n \mathbf{K}(\theta_n)_{mn} \mathbf{M}_{nj}, \end{aligned}$$

282 so  $\mathbf{G}(\theta_n) = \mathbf{M}\mathbf{K}(\theta_n)\mathbf{M}^\top$  for mass matrix  $\mathbf{M}$  and covariance matrix  $\mathbf{K}(\theta_n)_{ij} = k_\theta(x_i, x_j)$  for FEM node locations  $x_i, x_j$ .

283 First, we analyse the discretization error estimates for the EKF prior mean. In this case KS is non-integrable (14), so we  
284 use a refined FEM solution with 4096 mesh nodes as the reference solution, and compute the  $L^2$  error estimates  $\|u - u_h\|_2$  for  
285 FEM solutions  $u_h$  with  $\{32, 64, 128, 256, 512\}$  mesh nodes. We compute 100 timesteps with  $\Delta_t = 10^{-3}$  and then evaluate the  
286  $L^2$  error norm in each case. The results are shown in Figure S2a and show error  $\mathcal{O}(h^2)$  as with KdV.

To compute the filtering distribution  $p(\mathbf{u}^n | \mathbf{y}_{1:n}, \boldsymbol{\theta}_{1:n}, \sigma_{1:n}, \Lambda)$  we use a modified version of the EKF algorithm, with the priors given in Eq. (4). This modification makes use of the eigendecomposition of the covariance matrices  $\mathbf{C}_{n|n}$  and  $\mathbf{G}(\theta_n)$  and is called the *low rank EKF* in (15). For the cost of a truncated eigendecomposition this avoids inverting the Jacobian many times. We use this approximation when computing the prediction covariances  $\hat{\mathbf{C}}_{n|n-1}$  and  $\hat{\mathbf{G}}(\theta_n)$  which are  $(\mathbf{J}^n)^{-1} \mathbf{J}^{n-1} \mathbf{C}_{n|n-1} (\mathbf{J}^{n-1})^\top (\mathbf{J}^n)^{-\top}$  and  $(\mathbf{J}^n)^{-1} \mathbf{G}(\theta_n) (\mathbf{J}^n)^{-\top}$  respectively. Taking an eigendecomposition results in products of the form

$$(\mathbf{J}^n)^{-1} \mathbf{Q} \boldsymbol{\Lambda} \mathbf{Q}^\top (\mathbf{J}^n)^{-\top} = (\mathbf{J}^n)^{-1} \mathbf{Q} \boldsymbol{\Lambda} ((\mathbf{J}^n)^{-1} \mathbf{Q})^\top$$

287 which, if the first  $k$  eigenvalue/vector pairs are computed, results in having to invert  $\mathbf{J}^n$   $k$  times. So if  $k \ll M$  this can save  
288 some compute time. For this example we use the first 50 eigenvalue/vector pairs.

289 Results are shown in Figure S2. Figure S2b shows the posterior profiles for four times across the simulation. The initial  
290 conditions are the same and the posterior corrects for the difference between the data and the prior. The prior and posterior  
291 means, shown across the entire simulation grid in Figure S2c show completely different behaviour. This is likely due to KS being  
292 chaotic; small differences in the simulation early on are magnified by the end time. The estimated mismatch hyperparameters  
293 are shown in Figure S2d. The scale and length parameters each appear to reach stable estimates, which coincide with the prior  
294 mean. The noise (which has prior mean 0) is approximately identified at each iteration.

295 **B. Burgers' equation.** Burgers' equation is a nonlinear PDE that describes the balance of nonlinear steepening and viscous  
296 damping. The equation is often taken as a stepping-stone to the full simulation of the Navier-Stokes equations as it retains  
297 nonlinearity and viscous effects but is able to be solved in 1D (where the full Navier-Stokes requires at least 2D). In this  
298 subsection we study the 2D Burgers' equation given by

$$\begin{cases} u_t + uu_x + vv_y = \frac{1}{\text{Re}} \nabla^2 u, \\ v_t + uv_x + vv_y = \frac{1}{\text{Re}} \nabla^2 v, \\ u := u(x, t), \quad (x, y) \in [0, 2] \times [0, 2], \quad t \in [0, 5], \\ u(0, y, t) = u(2, y, t), \quad u(x, 0, t) = u(x, 2, t), \\ v(0, y, t) = v(2, y, t), \quad v(x, 0, t) = v(x, 2, t), \\ u(x, y, 0) = v(x, y, 0) = \sin(\pi(x + y)). \end{cases} \quad [6]$$

We discretize using  $P_1$  trial and test functions and Crank-Nicolson in time. The semi-discretized version of Eq. (6) (discretized in time) is

$$\begin{aligned} \langle u^n - u^{n-1}, w_1 \rangle + \Delta_t \langle u^{n+1/2} u_x^{n+1/2}, w_1 \rangle + \Delta_t \langle v^{n+1/2} u_y^{n+1/2}, w_1 \rangle + \Delta_t \frac{1}{\text{Re}} \langle \nabla u^{n+1/2}, \nabla w_1^{n+1/2} \rangle &= 0 \\ \langle v^n - v^{n-1}, w_2 \rangle + \Delta_t \langle u^{n+1/2} u_x^{n+1/2}, w_2 \rangle + \Delta_t \langle v^{n+1/2} u_y^{n+1/2}, w_2 \rangle + \Delta_t \frac{1}{\text{Re}} \langle \nabla v^{n+1/2}, \nabla w_2^{n+1/2} \rangle &= 0, \end{aligned}$$

300 for testing functions  $w_1, w_2$ , with periodic boundary conditions.

Data  $\mathbf{y}_n$  are generated by solving Eq. (6) with Reynolds number  $\text{Re} = 150$ . The statFEM conditions on 102 observations per timestep, which are jittered with simulated observational error  $\boldsymbol{\eta}_n \sim \mathcal{N}(0, 0.01^2)$ . Data is observed on the velocity field  $u$  only, and the observation locations are shown on the mesh in Figure S3a. Note that in application more careful design of experiments may be necessary in order to choose these observation locations, especially for complex domains and/or more nonlinear regimes. Due to damping noise becomes more apparent as the simulation runs. The base model is taken to be Eq. (6) with the added unknown forcing on the evolution equation for  $u$  only

$$\begin{aligned} u_t + uu_x + vu_y &= \frac{1}{\text{Re}} \nabla^2 u + \xi_\theta, \\ v_t + uv_x + vv_y &= \frac{1}{\text{Re}} \nabla^2 v. \end{aligned}$$

301 Mismatch is induced by setting  $\text{Re} = 100$  which in practice may occur because of discrepancy between measurements and  
 302 modelling assumptions. The covariance of  $\xi_\theta$  is given by  $\mathbb{E}[\xi_\theta(x, t)\xi_\theta(x', t')] = k_\theta(x, x') \cdot \delta(t, t')$ , with  $k_\theta$  given by a squared  
 303 exponential covariance function with parameters  $\theta_n = (\tau_n, \ell_n)$ . In this example we set  $\ell_n = 1$  to avoid recomputing  $\mathbf{G}(\theta_n)$  in  
 304 each iteration, which is computed in the same way as in the KS example (i.e. using the mass matrix  $\mathbf{G}(\theta_n) = \mathbf{M}\mathbf{K}(\theta_n)\mathbf{M}^\top$ ).  
 305 The assumed data generating process is

$$306 \quad \mathbf{y}_n = \mathbf{H} \begin{pmatrix} \mathbf{u}^n \\ \mathbf{v}^n \end{pmatrix} + \boldsymbol{\eta}_n \quad [7]$$

307 and data are assumed to be generated according to the Burgers equation plus some measurement error.

308 In implementation we compute the posterior using a regular mesh with  $64 \times 64$  elements in space (shown in Figure S3a)  
 309 and timestep  $\Delta_t = 0.01$ . The  $L^2$  discretization error for the initial conditions is shown in Figure S3b, estimated using  
 310 gridsizes of  $n_x = n_y \in \{16, 32, 64, 128, 256\}$  nodes (in each dimension). As with the previous examples we find that errors  
 311 are  $\mathcal{O}(h^2)$ , where  $h$  is in this case the size of the individual elements. We use the initial condition as computing a highly  
 312 refined solution becomes expensive due to the increasing number of mesh nodes in the solution. To compute the filtering  
 313 distribution  $p(\mathbf{u}^n | \mathbf{y}_{1:n}, \boldsymbol{\theta}_{1:n}, \sigma_{1:n}, \Lambda)$  we use the low-rank approximation as in the KS example, this time using the highest  
 314  $k = 128$  eigenvector/eigenvalue pairs.

315 Results are shown in Figure S4. Note that in this section we only plot the  $u$  component, as this is the field on which the  
 316 data is observed. The data generating process (Figure S4a) and posterior means (Figure S4b) show visual agreement, and the  
 317 posterior variances (Figure S4c) indicate that uncertainty is greatest about the regions where the classical shocks develop (i.e.  
 318 the regions of highest gradient in the solution surface) as well as the bottom right-hand corner which has the greatest distance  
 319 from the nearest observation location. As the simulation runs these localized regions of highest uncertainty dissipate as a result  
 320 of the viscous damping in the model due to the  $\frac{1}{\text{Re}} \nabla^2 u$  term.

321 The posterior surfaces shown in Figure S4d show the posterior means and the observed data points. The posterior mean  
 322 shows agreement with the observed data. The normalized relative  $L^2$  error  $\|\bar{\mathbf{u}} - \mathbf{u}_{\text{DGP}}\|_2 / \|\mathbf{u}_{\text{DGP}}\|_2$  is also plotted in Figure S4e,  
 323 for the prior mean and the posterior mean (this is approximated using FEM coefficients). The errors initially grow rapidly  
 324 and then stabilise with time. Rapid initial increase in error is the same for the prior and posterior and after the filtering  
 325 warm-up period — in which the noise is also overestimated (see Figure S4f) — the posterior error becomes lower than the  
 326 prior and appears to increase at a lower rate. Increasing error is to be expected as we are not updating the model coefficients,  
 327 only the numerical solution. Hence there will always be systematic differences between the data generating process and the  
 328 posterior which conditioning on data can only partly account for. We conjecture this results in consistently increasing errors.  
 329 Possible future work could investigate ways to estimate coefficients during the filtering procedure thus eliminating this source  
 330 of misspecification.

331 Finally the parameter estimates are shown in Figure S4f. The true value of the noise is shown as a dashed orange band.  
 332 After some warm-up time the parameters reach stable estimates with  $\sigma_n$  being slightly overestimated from the data. The  
 333 estimates of the mismatch scale  $\tau_n$  are more variable (similar to what is seen in the KdV examples) implying that the prediction  
 334 step of the model varies in it's ability to replicate the data.

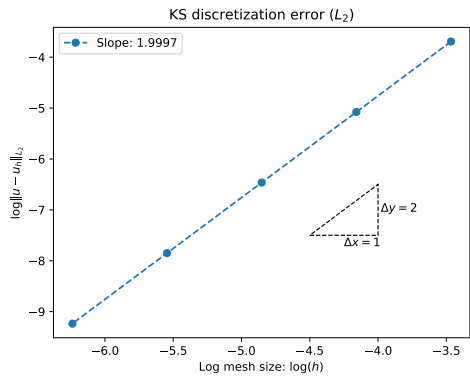

(a) KS  $L^2$  error estimates.

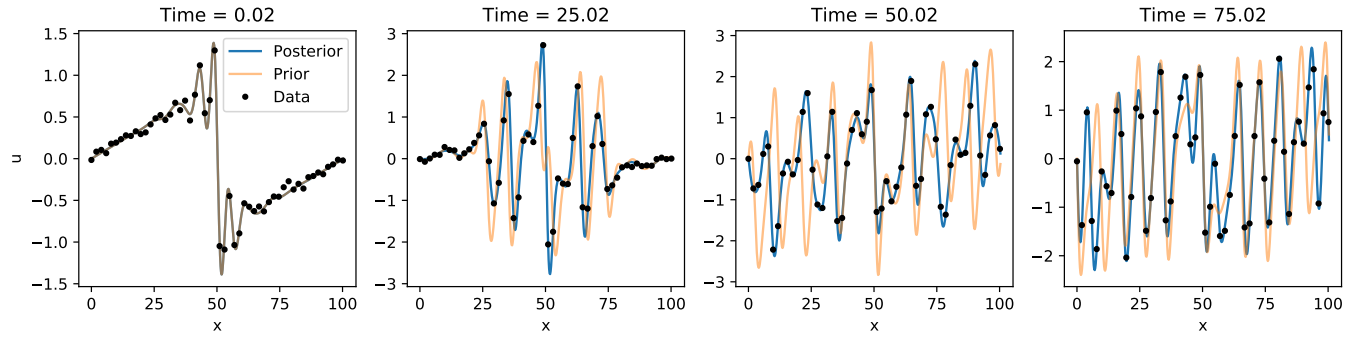

(b) Posterior mean and 95% credible intervals, prior mean, and observed data, for four evenly spaced times across the simulation.

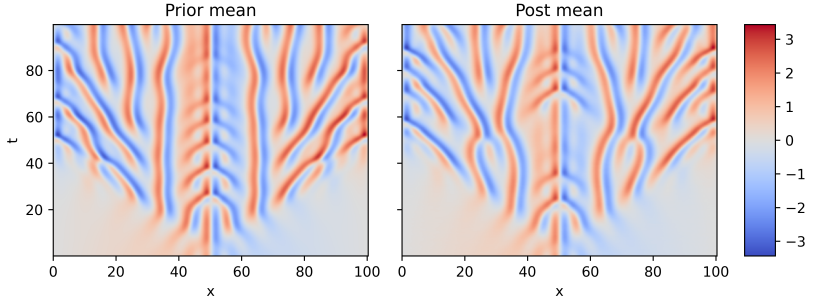

(c) Space-time view of prior and posterior means across the simulation grid. Conditioning on data gives a (visually) very different system

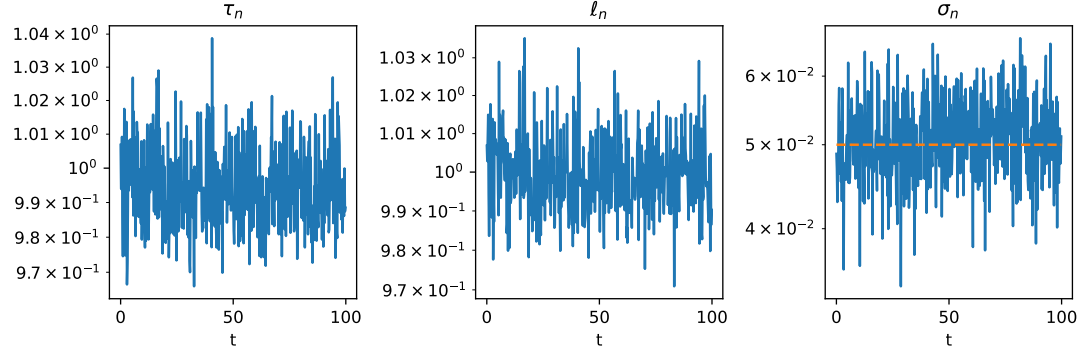

(d) Estimated covariance hyperparameters ( $\tau_n, \ell_n, \sigma_n$ ) for all times.

Fig. S2. KS equation posterior results.

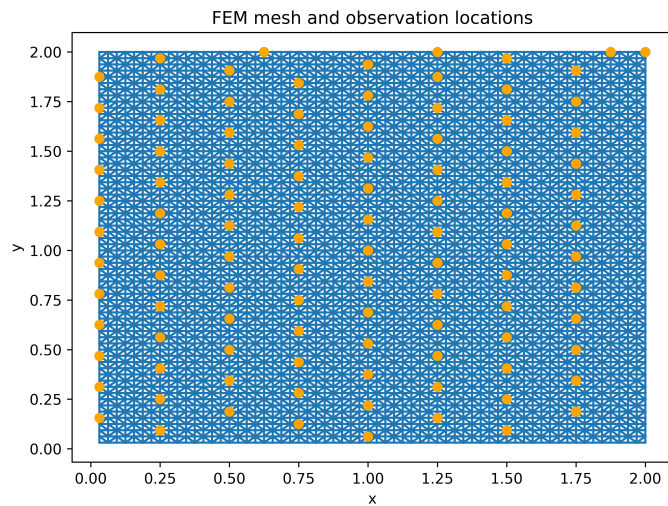

(a) Observation locations (orange) and FEM mesh (blue) for the Burgers example.

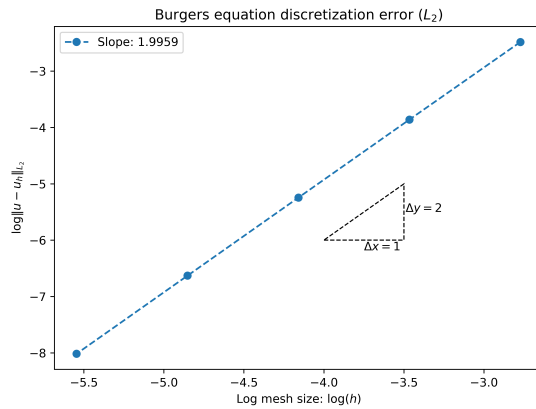

(b)  $L^2$  convergence rate computed for the 2D Burgers equation ( $u$  component only).

**Fig. S3.** 2D Burgers simulation: settings and setup.

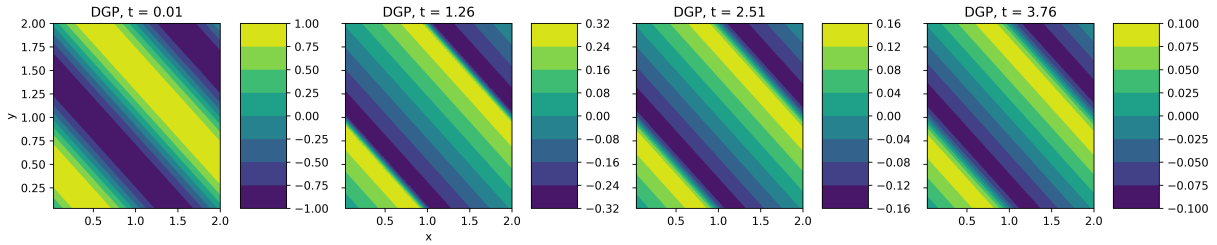

(a) Burgers DGP means for component  $u$  across all times.

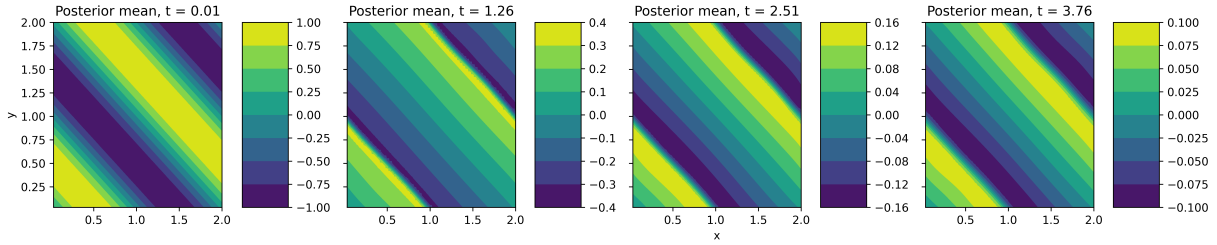

(b) Burgers posterior means for component  $u$  across all times.

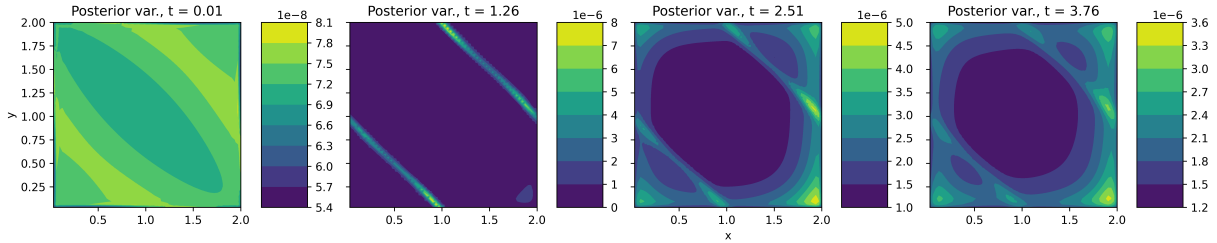

(c) Burgers posterior variances for component  $u$  on the mesh (using EKF).

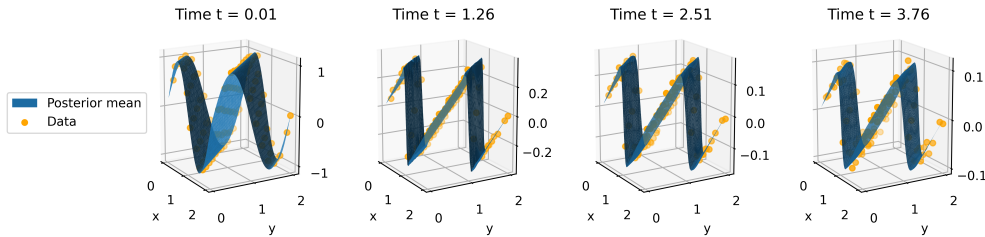

(d) Burgers equation surfaces for component  $u$  (shown as a blue surface) and observed data (orange points).

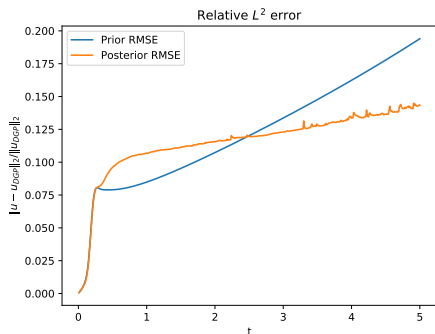

(e) Relative  $L^2$  error between the prior/posterior mean and the known data generating process (on the  $u$  component only).

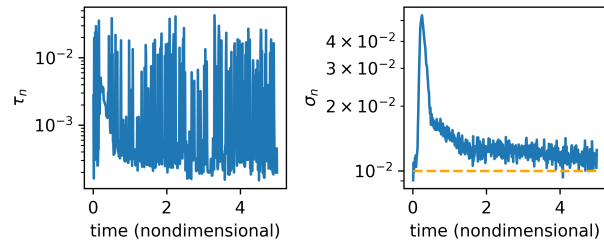

(f) Burgers parameter estimates. The dashed orange line shows the true value of the noise which appears slightly overestimated at each time. We conjecture this may be due to identifiability problems with the stochastic forcing magnitude.

Fig. S4. 2D Burgers equation results using the EKF.

335 **References**

- 336 1. Stuart AM (2010) Inverse problems: a Bayesian perspective. *Acta numerica* 19:451–559.  
337 2. Evans LC (1998) *Partial Differential Equations*. (American Mathematical Society).  
338 3. Williams CK, Rasmussen CE (2006) *Gaussian processes for machine learning*. (MIT press Cambridge, MA) Vol. 2.  
339 4. Thomée V (2006) *Galerkin finite element methods for parabolic problems*, Springer series in computational mathematics.  
340 (Springer, Berlin ; New York) No. v. 25, 2nd ed edition.  
341 5. Särkkä S, Solin A (2019) *Applied stochastic differential equations*. (Cambridge University Press) Vol. 10.  
342 6. Shumway RH, Stoffer DS (2017) *Time Series Analysis and Its Applications: With R Examples*, Springer Texts in Statistics.  
343 (Springer International Publishing), 4 edition.  
344 7. Houtekamer PL, Mitchell HL (2001) A Sequential Ensemble Kalman Filter for Atmospheric Data Assimilation. *Monthly*  
345 *Weather Review* 129(1):123–137.  
346 8. Golub GH, Van Loan CF (1996) *Matrix Computations*. (The Johns Hopkins University Press), Third edition.  
347 9. Stan Development Team (2020) *Stan User’s Guide*.  
348 10. Debussche A, Printems J (1999) Numerical simulation of the stochastic Korteweg–de Vries equation. *Physica D: Nonlinear*  
349 *Phenomena* 134(2):200–226.  
350 11. Trefethen LN, Weideman J (2014) The exponentially convergent trapezoidal rule. *SIAM Review* 56(3):385–458.  
351 12. Logg A, Mardal KA, Wells G (2012) *Automated solution of differential equations by the finite element method: The*  
352 *FEniCS book*. (Springer Science & Business Media) Vol. 84.  
353 13. Hyman JM, Nicolaenko B (1986) The Kuramoto-Sivashinsky equation: A bridge between PDE’s and dynamical systems.  
354 *Physica D: Nonlinear Phenomena* 18(1):113–126.  
355 14. Conte R, Musette M (1989) Painleve analysis and Backlund transformation in the Kuramoto-Sivashinsky equation. *Journal*  
356 *of Physics A: Mathematical and General* 22(2):169–177.  
357 15. Law KJH, Stuart AM (2012) Evaluating Data Assimilation Algorithms. *Monthly Weather Review* 140(11):3757–3782.
